# Supplementary material for: Ciprofloxacin Induced Antibiotic Resistance in Salmonella Typhimurium Mutants and Genome Analysis
Source: Research Square preprint supplement (doi:10.21203/rs.3.rs-656905/v1), 2021-06-30
Supplement: Supplementary file 1 [file 1df1b80bb6e456007e30dd66.docx]

**Ciprofloxacin induced antibiotic resistance in *Salmonella* *Typhimurium* mutants and genome analysis**

**Aarti S. Kakatkara, Anubrata Dasc, Ravindranath Shashidharab#**

**Food Technology Division, Bhabha Atomic Research Centre, Mumbai, Indiaa**

**Life Sciences, Homi Bhabha National Institute (Deemed to be University), Mumbai, Indiab**

**Bio Organic Division, Bhabha Atomic Research Centre, Mumbai, Indiac**

**#Corresponding author: Ravindranath Shashidhar, Food Technology Division, Bhabha Atomic Research Centre, Trombay, India- 400085, (O)+91 22-25593961**

**Address correspondence to** [***shashi@barc.gov.in***](mailto:shashi@barc.gov.in)

**Journal name Archives of Microbiology**

**Fig. S2** Development of resistance in *S*. *Typhimurium* and clones A, B and C. Clone A shows steady increase in MIC by 25 folds in 4th cycle, 50 folds in 6th cycle and 100 folds in 10th cycle. Clone B shows a sudden increase by 50 folds in 2nd cycle which remained steady up to 8th cycle and reached 100 folds in 10th cycle. Clone C shows directly 100 folds increase in 4th cycle. All three clones show a saturation of MIC after 10 cycles till end of 20 cycles
