# Supplementary material for: Ciprofloxacin Induced Antibiotic Resistance in Salmonella Typhimurium Mutants and Genome Analysis
Source: Research Square preprint supplement (doi:10.21203/rs.3.rs-656905/v1), 2021-06-30
Supplement: Supplementary file 2 [file 36dd404ca54045ee605b42e4.docx]

**Ciprofloxacin induced antibiotic resistance in *Salmonella* *Typhimurium* mutants and genome analysis**

**Aarti S. Kakatkara, Anubrata Dasc, Ravindranath Shashidharab#**

**Food Technology Division, Bhabha Atomic Research Centre, Mumbai, Indiaa**

**Life Sciences, Homi Bhabha National Institute (Deemed to be University), Mumbai, Indiab**

**Bio Organic Division, Bhabha Atomic Research Centre, Mumbai, Indiac**

**#Corresponding author: Ravindranath Shashidhar, Food Technology Division, Bhabha Atomic Research Centre, Trombay, India- 400085, (O)+91 22-25593961**

**Address correspondence to** [***shashi@barc.gov.in***](mailto:shashi@barc.gov.in)

**Journal name Archives of Microbiology**


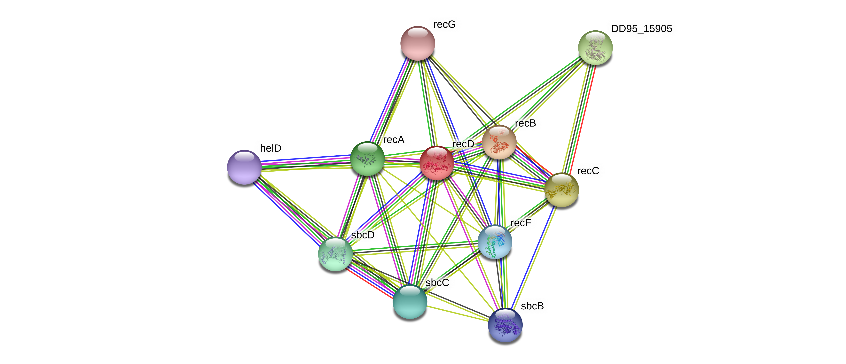

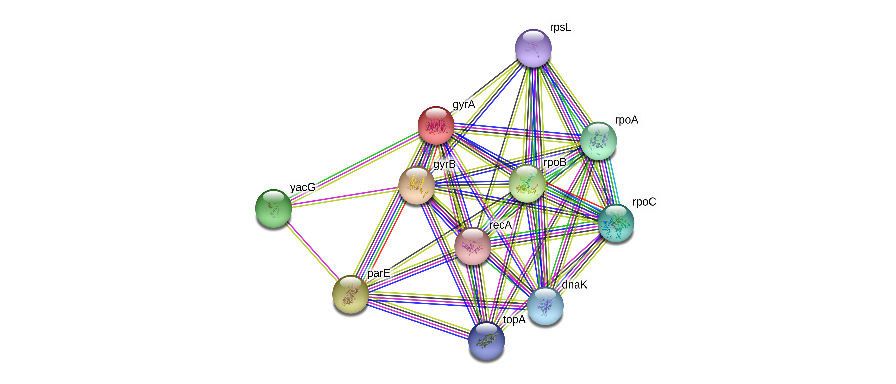

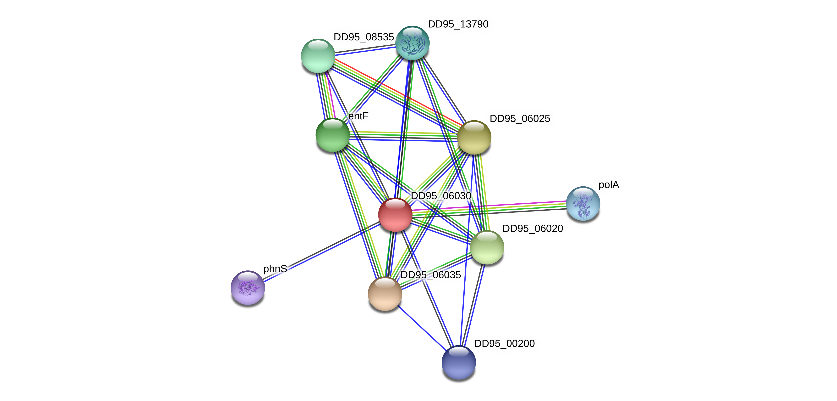

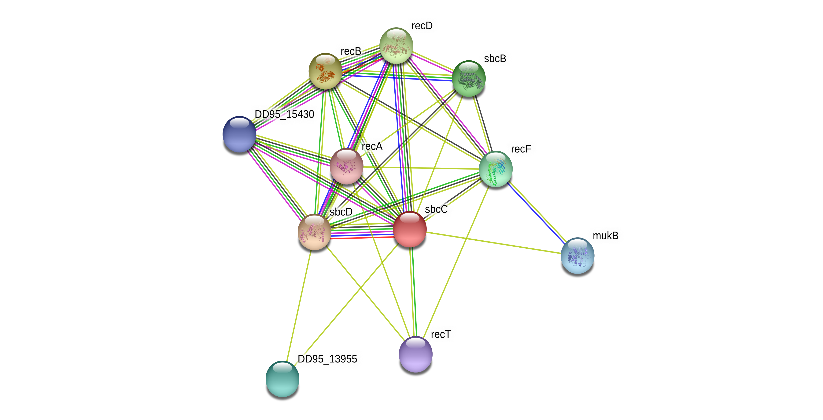


***sbc*C**

***rec*D**

***gyr*A**

***iro*C**

**Fig. S1** Relationship between different genes. *rec*D, *sbc*C interact very strongly. they interact with *gyrA* via *recA*. surprisingly *iroC* interacts with *gyrA* through *polA* another polymerase; so, we propose that to develop resistance to ciprofloxacin, the mutations in these genes collected probably led to DNA breakages/slippage during replication etc and error prone recombination repair leading to such high number of mutations
