# Supplementary material for: Ciprofloxacin Induced Antibiotic Resistance in Salmonella Typhimurium Mutants and Genome Analysis
Source: Research Square preprint supplement (doi:10.21203/rs.3.rs-656905/v1), 2021-06-30
Supplement: Supplementary file 3 [file 3871dd1225b5fbc82bf7d1c6.docx]

**Ciprofloxacin induced antibiotic resistance in *Salmonella* *Typhimurium* mutants and genome analysis**

**Aarti S. Kakatkara, Anubrata Dasc, Ravindranath Shashidharab#**

**Food Technology Division, Bhabha Atomic Research Centre, Mumbai, Indiaa**

**Life Sciences, Homi Bhabha National Institute (Deemed to be University), Mumbai, Indiab**

**Bio Organic Division, Bhabha Atomic Research Centre, Mumbai, Indiac**

**#Corresponding author: Ravindranath Shashidhar, Food Technology Division, Bhabha Atomic Research Centre, Trombay, India- 400085, (O)+91 22-25593961**

**Address correspondence to** [***shashi@barc.gov.in***](mailto:shashi@barc.gov.in)

**Journal name Archives of Microbiology**

**Table S1 Variations observed between the three clones on whole genome sequencing**

|  | A | B | C |
| --- | --- | --- | --- |
| Total number of variants | 40971 | 42807 | 41159 |
| SNPs | 40858 | 42668 | 40978 |
| INDELS | 113 | 139 | 181 |
